# Supplementary material for: Impact of Juice Extraction Method (Flash Détente vs. Conventional Must Heating) and Chemical Treatments on Color Stability of Rubired Juice Concentrates under Accelerated Aging Conditions
Source: MDPI journal article supplement (doi:10.3390/foods9091270), 2020-09-10
Supplement: s1 [file s1]

## Supplementary Materials For

# Impact of Juice Extraction Method (Flash Détente vs. Conventional Must Heating) and Chemical Treatments on Color Stability of Rubired Juice Concentrates under Accelerated Aging Conditions

Richard G. Ntuli <sup>1,2</sup>, Ravi Ponangi <sup>1</sup>, David W. Jeffery <sup>2,\*</sup> and Kerry L. Wilkinson <sup>2</sup>

<sup>1</sup> E & J Gallo Winery, Process Technology, PO Box 1130, Modesto, CA, 95353, USA; richard.ntuli@ejgallo.com (R.G.N.); ravi.ponangi@ejgallo.com (R.P.)

<sup>2</sup> School of Agriculture, Food and Wine, The University of Adelaide, PMB 1, Glen Osmond, SA 5064, Australia; kerry.wilkinson@adelaide.edu.au (K.L.W.)

\* Correspondence: email: david.jeffery@adelaide.edu.au (D.W.J.); Tel: +61-8-8313-6649

## Table of Contents

Page

|                                                                                                                                                                                                                                                                                                                                   |    |
|-----------------------------------------------------------------------------------------------------------------------------------------------------------------------------------------------------------------------------------------------------------------------------------------------------------------------------------|----|
| <b>Figure S1.</b> Flowchart of conventional must heating vs. flash détente processes for production of Rubired concentrate.                                                                                                                                                                                                       | S2 |
| <b>Figure S2.</b> Fitted means for interaction plot for 5-hydroxymethylfurfural (5-HMF) in Rubired concentrate from conventional must heating (CMH) vs. flash détente (FD), heated at 50 °C; $\alpha = 0.05$ ; $n = 2$ . All data normalized to 68 °Brix and to initial concentration to enable calculation of percentage change. | S3 |
| <b>Figure S3.</b> Effect of seed tannin, low pH, and acetaldehyde on 5-hydroxymethylfurfural (5-HMF) formation in Rubired concentrate from conventional must heating (CMH) at different temperatures. All data normalized to 68 °Brix. Note the different y-axis scales.                                                          | S4 |
| <b>Figure S4.</b> Effect of seed tannin, low pH, and acetaldehyde on caftaric acid concentration in Rubired concentrate from conventional must heating (CMH) at different temperatures. All data normalized to 68 °Brix.                                                                                                          | S5 |
| <b>Figure S5.</b> Change in proanthocyanidin concentration during accelerated aging of Rubired concentrate from conventional must heating (CMH) at different temperatures. All data normalized to 68 °Brix. Note the different y-axis scales.                                                                                     | S6 |
| <b>Figure S6.</b> Change in gallic acid concentration during accelerated aging of Rubired concentrate from conventional must heating (CMH) at different temperatures. All data normalized to 68 °Brix. Note the different y-axis scales.                                                                                          | S7 |
| <b>Table S1.</b> Comparison of 5-hydroxymethylfurfural (5-HMF) concentrations in Rubired concentrate from conventional must heating (CMH) vs. flash détente (FD), after nine days of accelerated aging at different temperatures.                                                                                                 | S8 |
| <b>Table S2.</b> Sediment composition of concentrate from conventional must heating after 12 days of accelerated aging at 70 °C.                                                                                                                                                                                                  | S9 |

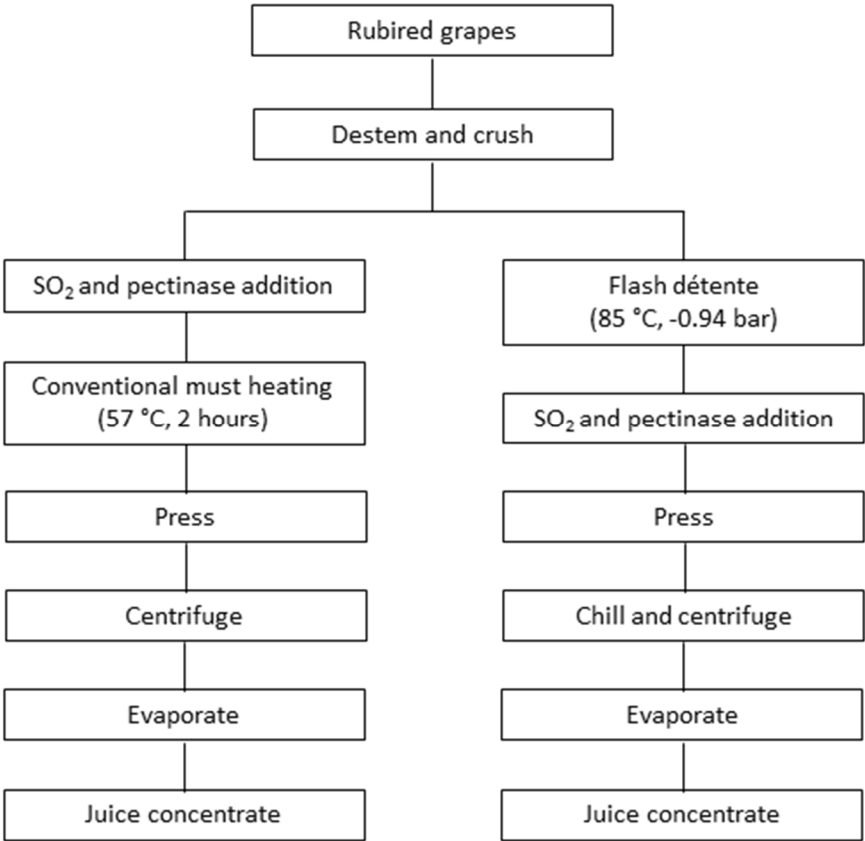

**Figure S1.** Flowchart of conventional must heating vs. flash détente processes for production of Rubired concentrate.

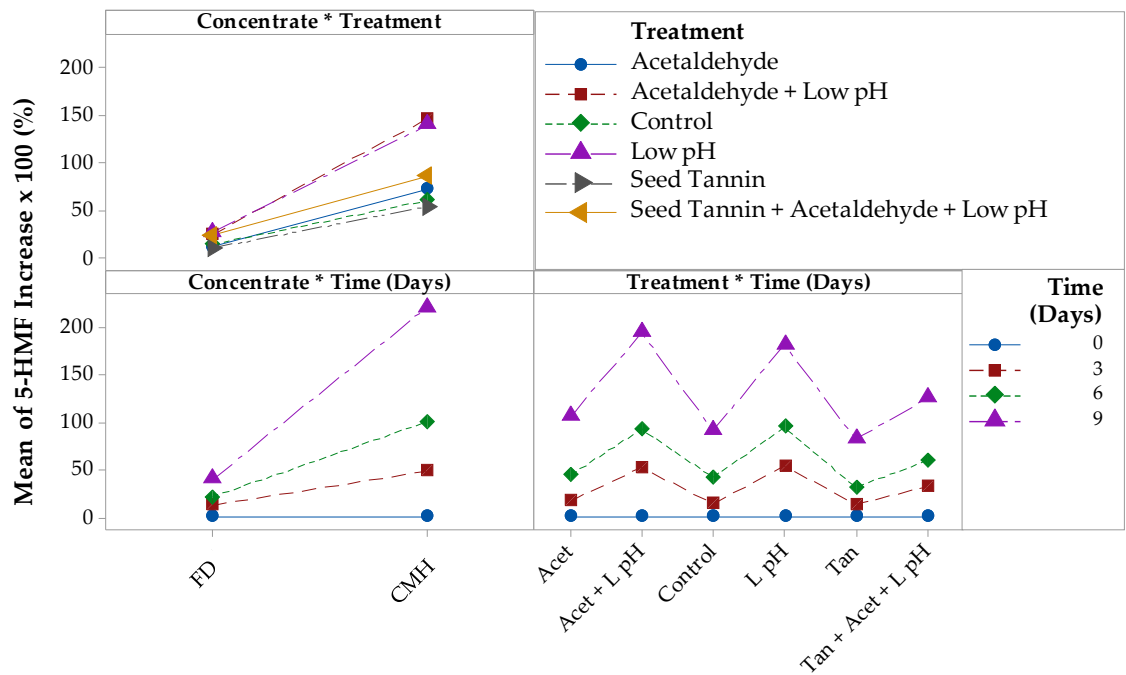

**Figure S2.** Fitted means for interaction plot for 5-hydroxymethylfurfural (5-HMF) in Rubired concentrate from conventional must heating (CMH) vs. flash détente (FD), heated at 50 °C;  $\alpha = 0.05$ ;  $n = 2$ . All data normalized to 68 °Brix and to initial concentration to enable calculation of percentage change.

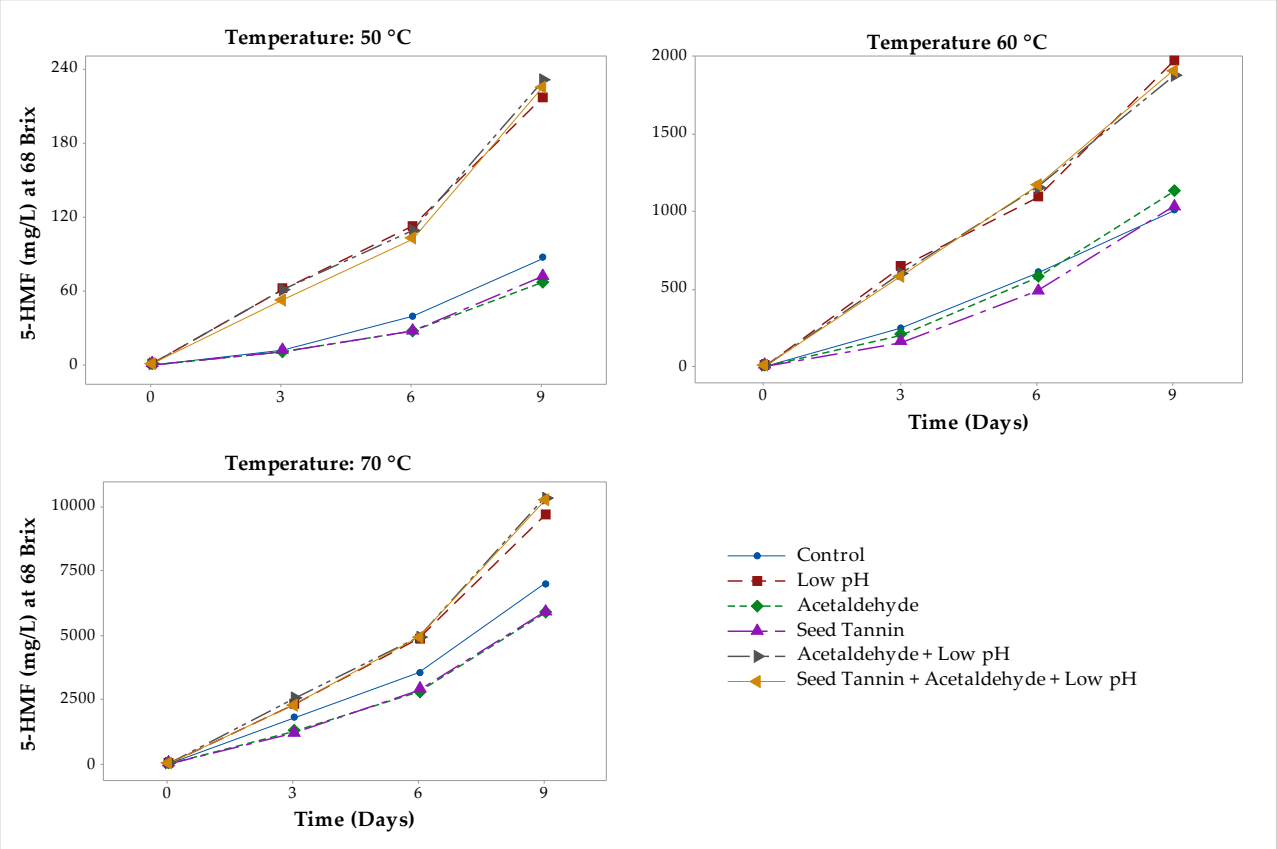

**Figure S3.** Effect of seed tannin, low pH, and acetaldehyde on 5-hydroxymethylfurfural (5-HMF) formation in Rubired concentrate from conventional must heating (CMH) at different temperatures. All data normalized to 68 °Brix. Note the different y-axis scales.

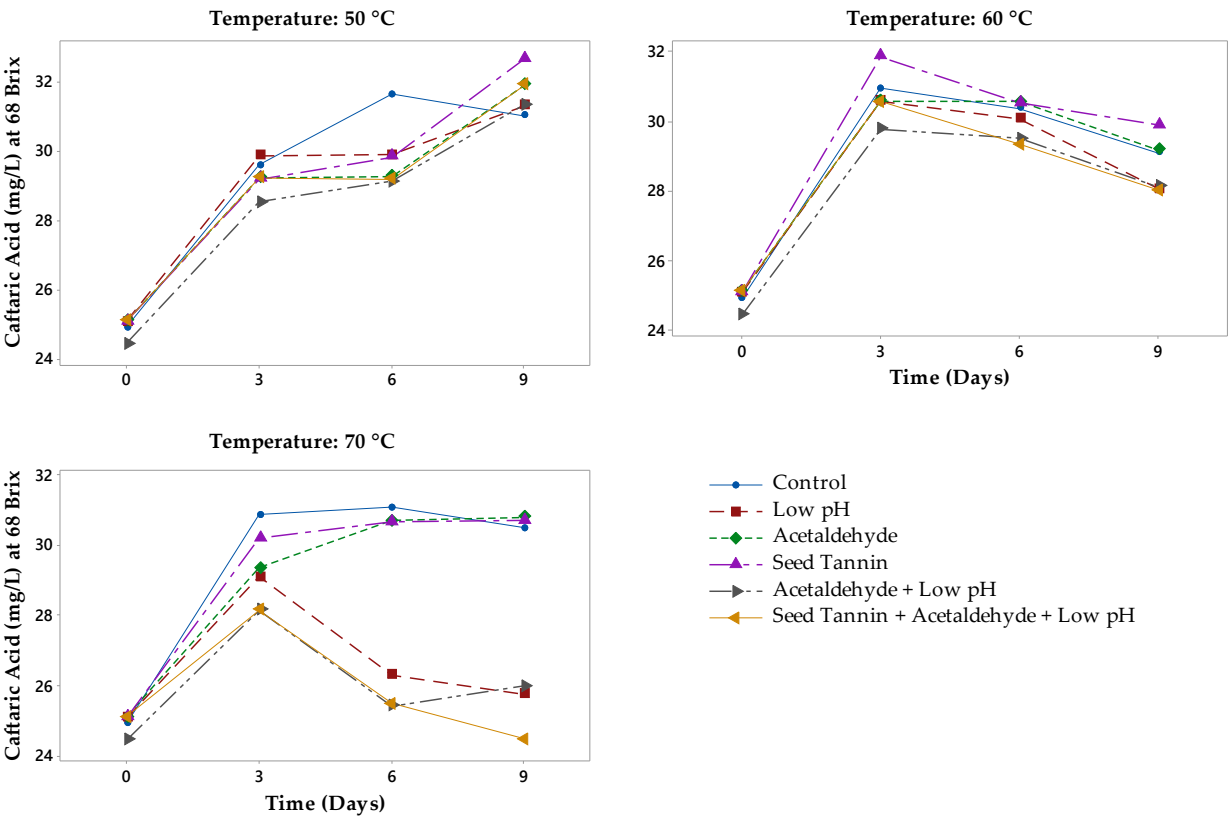

**Figure S4.** Effect of seed tannin, low pH, and acetaldehyde on caftaric acid concentration in Rubired concentrate from conventional must heating (CMH) at different temperatures. All data normalized to 68 °Brix.

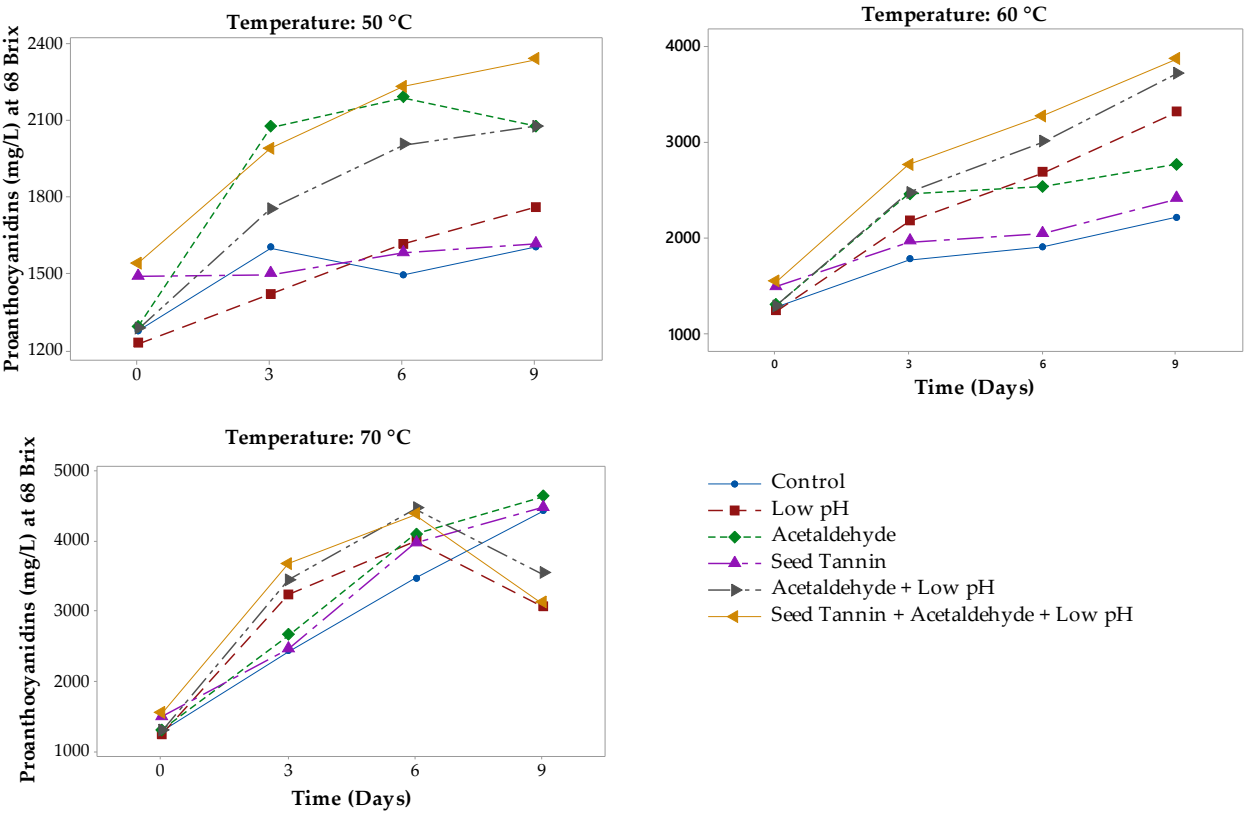

**Figure S5.** Change in proanthocyanidin concentration during accelerated aging of Rubired concentrate from conventional must heating (CMH) at different temperatures. All data normalized to 68 °Brix. Note the different y-axis scales.

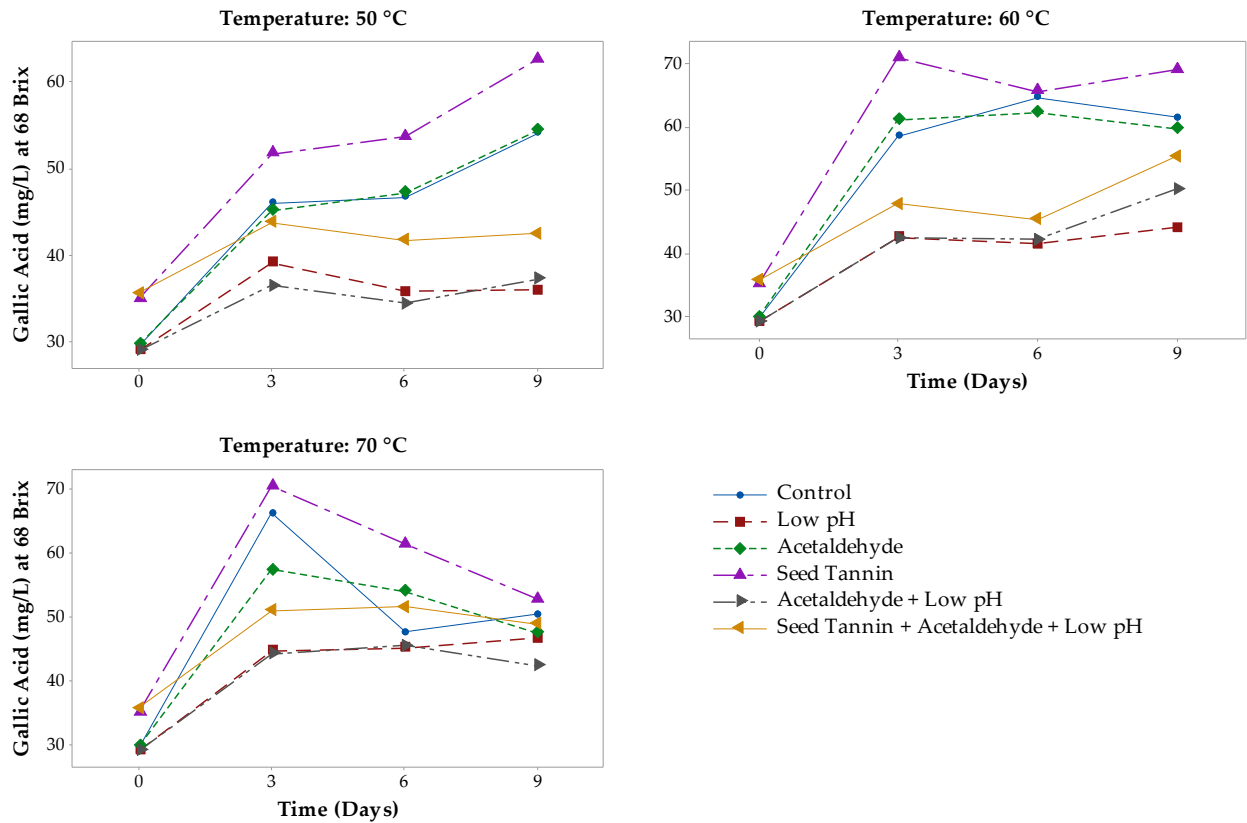

**Figure S6.** Change in gallic acid concentration during accelerated aging of Rubired concentrate from conventional must heating (CMH) at different temperatures. All data normalized to 68 °Brix. Note the different y-axis scales.

**Table S1.** Comparison of 5-hydroxymethylfurfural (5-HMF) concentrations in Rubired concentrate from conventional must heating (CMH) vs flash détente (FD), after nine days of accelerated aging at different temperatures.

| Treatment                           | Temperature | CMH             |      | FD              |      |
|-------------------------------------|-------------|-----------------|------|-----------------|------|
|                                     |             | 5-HMF<br>(mg/L) | %RSD | 5-HMF<br>(mg/L) | %RSD |
| Seed Tannin + Acetaldehyde + Low pH | 50 °C       | 225 a           | 9.5  | 176 a           | 12.3 |
| Acetaldehyde + Low pH               |             | 230 a           | 19.5 | 186 a           | 20.9 |
| Low pH                              |             | 217 a           | 1.7  | 168 ab          | 13.4 |
| Acetaldehyde                        |             | 67 b            | 24.0 | 73 c            | 5.0  |
| Seed Tannin                         |             | 72 b            | 17.3 | 59 c            | 13.3 |
| Control                             |             | 87 b            | 23.2 | 87 bc           | 4.3  |
| Seed Tannin + Acetaldehyde + Low pH | 60 °C       | 1909 a          | 5.4  | 1580 a          | 2.5  |
| Acetaldehyde + Low pH               |             | 1875 a          | 11.9 | 1769 a          | 4.8  |
| Low pH                              |             | 1969 a          | 1.3  | 1626 a          | 16.3 |
| Acetaldehyde                        |             | 1127 b          | 9.3  | 914 b           | 1.3  |
| Seed Tannin                         |             | 1030 b          | 3.8  | 858 b           | 6.3  |
| Control                             |             | 1005 b          | 7.8  | 874 b           | 0.1  |
| Seed Tannin + Acetaldehyde + Low pH | 70 °C       | 10234 a         | 6.9  | 8054 a          | 1.5  |
| Acetaldehyde + Low pH               |             | 10317 a         | 3.8  | 7618 a          | 3.6  |
| Low pH                              |             | 9665 a          | 1.6  | 7056 ab         | 7.8  |
| Acetaldehyde                        |             | 5860 b          | 4.6  | 4694 c          | 4.5  |
| Seed Tannin                         |             | 5887 b          | 3.7  | 4676 c          | 0.8  |
| Control                             |             | 6975 b          | 6.2  | 6290 b          | 3.0  |

Data are means of two replicates ( $n = 2$ ), normalized to 68 °Brix; %RSD = percentage relative standard deviation. Means followed by different letters (within columns, by temperature) are significantly different ( $\alpha = 0.05$ , Tukey pairwise comparisons).



**Table S2.** Sediment composition of concentrate from conventional must heating after 12 days of accelerated aging at 70 °C.

| Treatment                                         | A420 | A520 | 5-HMF (mg) | Proantho-<br>cyanidins (mg) | Pigmented<br>Polymers (mg) | Tannin<br>(mg) | Sediment<br>(g) |
|---------------------------------------------------|------|------|------------|-----------------------------|----------------------------|----------------|-----------------|
| Control                                           | 3.12 | 1.14 | 11.91 b    | 7.00 b                      | 0.86 b                     | 26.6           | 3.36 b          |
| Seed Tannin                                       | 6.66 | 2.64 | 20.17 b    | 12.38 ab                    | 0.99 ab                    | 52.9           | 3.69 b          |
| Acetaldehyde                                      | 4.3  | 1.73 | 14.53 b    | 10.68 ab                    | 0.97 ab                    | 32.9           | 3.49 b          |
| Low pH                                            | 6.91 | 2.79 | 72.02 a    | 16.68 ab                    | 1.07 ab                    | 62.1           | 11.51 a         |
| Acetaldehyde + Low pH                             | 7.41 | 3.21 | 80.86 a    | 17.61 a                     | 1.16 a                     | 64.8           | 11.35 a         |
| Seed Tannin + Acetaldehyde + Low pH               | 7.51 | 3.25 | 75.3 a     | 17.86 a                     | 1.16 a                     | 64.6           | 12.13 a         |
| <i>p</i> -value                                   | ns   | ns   | 0.0001     | 0.025                       | 0.026                      | ns             | 0.0001          |
| Pearson's Coefficient <i>r</i> with Sediment Mass | 0.79 | 0.82 | 0.99       | 0.92                        | 0.89                       | 0.87           | –               |

Data are means of two replicates ( $n = 2$ ), normalized to 68 °Brix. Means followed by different letters (within columns) are significantly different ( $\alpha = 0.05$ , Tukey pairwise comparisons); ns = no significance.
